# Supplementary material for: High-level adherence to a Mediterranean diet beneficially impacts the gut microbiota and associated metabolome
Source: HighWire-hosted journal article supplement (doi:10.1136/gutjnl-2015-309957), 2015-09-28
Supplement: gutjnl-2015-309957supp_tables.pdf [file gutjnl-2015-309957supp_tables.pdf]

**Table S1.** Median values of food consumption and macro/micro-nutrients intake per day for each of the three diet types and MD adherence classes.

| Nutritional information             | Adherence to MD      |                       |                      | Diet type            |                      |                      |
|-------------------------------------|----------------------|-----------------------|----------------------|----------------------|----------------------|----------------------|
|                                     | low                  | medium                | high                 | O                    | VG                   | V                    |
| Total energy (kcal/day)             | 2579.77 <sup>a</sup> | 2285.00 <sup>a</sup>  | 2366.98 <sup>a</sup> | 2439.44 <sup>a</sup> | 2332.31 <sup>a</sup> | 2326.73 <sup>a</sup> |
| Energy from protein (%)             | 13.97 <sup>a</sup>   | 13.66 <sup>a</sup>    | 12.19 <sup>b</sup>   | 14.73 <sup>a</sup>   | 11.74 <sup>b</sup>   | 11.62 <sup>b</sup>   |
| Energy from total fat (%)           | 36.73 <sup>a</sup>   | 36.36 <sup>a</sup>    | 35.62 <sup>a</sup>   | 38.39 <sup>a</sup>   | 35.99 <sup>b</sup>   | 31.44 <sup>c</sup>   |
| Energy from saturated fat (%)       | 13.53 <sup>a</sup>   | 12.82 <sup>a</sup>    | 6.93 <sup>b</sup>    | 14.52 <sup>a</sup>   | 10.15 <sup>b</sup>   | 5.78 <sup>c</sup>    |
| Energy from monounsaturated fat (%) | 17.12 <sup>b</sup>   | 18.02 <sup>b</sup>    | 20.04 <sup>a</sup>   | 19.55 <sup>a</sup>   | 19.50 <sup>a</sup>   | 18.01 <sup>b</sup>   |
| Energy from polyunsaturated fat (%) | 5.38 <sup>b</sup>    | 5.16 <sup>b</sup>     | 6.23 <sup>a</sup>    | 5.35 <sup>c</sup>    | 5.66 <sup>b</sup>    | 7.18 <sup>a</sup>    |
| Energy from carbohydrates (%)       | 48.56 <sup>b</sup>   | 50.87 <sup>a,b</sup>  | 54.20 <sup>a</sup>   | 46.74 <sup>b</sup>   | 54.08 <sup>a</sup>   | 57.95 <sup>a</sup>   |
| Energy from sugars (%)              | 17.00 <sup>a</sup>   | 17.15 <sup>a</sup>    | 18.44 <sup>a</sup>   | 16.06 <sup>b</sup>   | 18.71 <sup>a</sup>   | 18.84 <sup>a</sup>   |
| Total protein (g/day)               | 34.89 <sup>a</sup>   | 34.30 <sup>a</sup>    | 31.16 <sup>b</sup>   | 36.72 <sup>a</sup>   | 29.06 <sup>b</sup>   | 29.04 <sup>b</sup>   |
| Animal protein (g/day)              | 21.44 <sup>a</sup>   | 16.48 <sup>b</sup>    | 0.18 <sup>c</sup>    | 22.62 <sup>a</sup>   | 6.32 <sup>b</sup>    | 0.00 <sup>c</sup>    |
| Vegetable protein (g/day)           | 13.63 <sup>c</sup>   | 15.91 <sup>b</sup>    | 25.76 <sup>a</sup>   | 13.62 <sup>c</sup>   | 22.24 <sup>b</sup>   | 28.96 <sup>a</sup>   |
| Total fat (g/day)                   | 40.49 <sup>a</sup>   | 41.04 <sup>a</sup>    | 39.61 <sup>a</sup>   | 43.62 <sup>a</sup>   | 40.07 <sup>b</sup>   | 35.43 <sup>c</sup>   |
| Animal fat (g/day)                  | 21.55 <sup>a</sup>   | 19.38 <sup>a</sup>    | 0.29 <sup>b</sup>    | 22.10 <sup>a</sup>   | 9.20 <sup>b</sup>    | 0.00 <sup>c</sup>    |
| Vegetable fat (g/day)               | 19.21 <sup>c</sup>   | 24.59 <sup>b</sup>    | 32.95 <sup>a</sup>   | 22.07 <sup>c</sup>   | 28.81 <sup>b</sup>   | 35.39 <sup>a</sup>   |
| Saturated fat (g/day)               | 15.04 <sup>a</sup>   | 14.24 <sup>a</sup>    | 7.70 <sup>b</sup>    | 16.13 <sup>a</sup>   | 11.28 <sup>b</sup>   | 6.42 <sup>c</sup>    |
| Monounsaturated fat (g/day)         | 19.02 <sup>b</sup>   | 20.03 <sup>b</sup>    | 22.26 <sup>a</sup>   | 21.73 <sup>a</sup>   | 21.66 <sup>a</sup>   | 20.01 <sup>a</sup>   |
| Polyunsaturated fat (g/day)         | 5.98 <sup>b</sup>    | 5.73 <sup>b</sup>     | 6.92 <sup>a</sup>    | 5.94 <sup>b</sup>    | 6.29 <sup>b</sup>    | 7.98 <sup>a</sup>    |
| Total carbohydrates (g/day)         | 120.55 <sup>b</sup>  | 127.36 <sup>a,b</sup> | 135.87 <sup>a</sup>  | 116.44 <sup>c</sup>  | 134.71 <sup>b</sup>  | 145.54 <sup>a</sup>  |
| Starch (g/day)                      | 76.76 <sup>a</sup>   | 81.88 <sup>a</sup>    | 82.11 <sup>a</sup>   | 74.33 <sup>b</sup>   | 82.03 <sup>a</sup>   | 84.27 <sup>a</sup>   |
| Soluble carbohydrates (g/day)       | 42.50 <sup>a</sup>   | 42.88 <sup>a</sup>    | 46.10 <sup>a</sup>   | 40.15 <sup>b</sup>   | 46.77 <sup>a</sup>   | 47.09 <sup>a</sup>   |
| Total fibre (g/day)                 | 10.85 <sup>b</sup>   | 11.50 <sup>b</sup>    | 18.83 <sup>a</sup>   | 10.37 <sup>c</sup>   | 15.15 <sup>b</sup>   | 21.02 <sup>a</sup>   |

|                                   |                       |                      |                      |                      |                      |                      |
|-----------------------------------|-----------------------|----------------------|----------------------|----------------------|----------------------|----------------------|
| Cholesterol<br>(mg/day)           | 125.22 <sup>a</sup>   | 105.92 <sup>b</sup>  | 12.26 <sup>c</sup>   | 132.75 <sup>a</sup>  | 53.59 <sup>b</sup>   | 0.00 <sup>c</sup>    |
| Alcohol<br>(g/day)                | 4.73 <sup>a</sup>     | 2.38 <sup>b</sup>    | 1.65 <sup>b</sup>    | 3.70 <sup>a</sup>    | 1.27 <sup>b</sup>    | 0.95 <sup>b</sup>    |
| Iron<br>(mg/day)                  | 5.93 <sup>b</sup>     | 6.26 <sup>b</sup>    | 8.54 <sup>a</sup>    | 5.93 <sup>c</sup>    | 7.67 <sup>b</sup>    | 9.28 <sup>a</sup>    |
| Calcium<br>(mg/day)               | 355.02 <sup>a,b</sup> | 418.22 <sup>a</sup>  | 332.72 <sup>b</sup>  | 381.05 <sup>a</sup>  | 376.00 <sup>a</sup>  | 308.11 <sup>b</sup>  |
| Sodium<br>(mg/day)                | 1547.77 <sup>a</sup>  | 1526.50 <sup>a</sup> | 1308.65 <sup>b</sup> | 1522.90 <sup>a</sup> | 1465.40 <sup>a</sup> | 1239.37 <sup>b</sup> |
| Potassium<br>(mg/day)             | 1396.31 <sup>c</sup>  | 1511.63 <sup>b</sup> | 1866.78 <sup>a</sup> | 1371.71 <sup>c</sup> | 1610.40 <sup>b</sup> | 1967.41 <sup>a</sup> |
| Phosphorus<br>(mg/day)            | 606.80 <sup>a</sup>   | 611.89 <sup>a</sup>  | 581.75 <sup>a</sup>  | 639.45 <sup>a</sup>  | 580.10 <sup>b</sup>  | 565.37 <sup>b</sup>  |
| Zinc<br>(mg/day)                  | 5.64 <sup>a</sup>     | 5.44 <sup>a</sup>    | 5.12 <sup>a</sup>    | 5.75 <sup>a</sup>    | 5.05 <sup>a</sup>    | 5.07 <sup>a</sup>    |
| Vitamin B1<br>(mg/day)            | 0.64 <sup>b</sup>     | 0.60 <sup>b</sup>    | 0.76 <sup>a</sup>    | 0.60 <sup>c</sup>    | 0.66 <sup>b</sup>    | 0.79 <sup>a</sup>    |
| Vitamin B2<br>(mg/day)            | 0.72 <sup>a</sup>     | 0.75 <sup>a</sup>    | 0.76 <sup>a</sup>    | 0.75 <sup>a</sup>    | 0.74 <sup>a</sup>    | 0.77 <sup>a</sup>    |
| Niacin<br>(mg/day)                | 9.19 <sup>a</sup>     | 9.44 <sup>a</sup>    | 9.27 <sup>a</sup>    | 9.84 <sup>a</sup>    | 7.78 <sup>b</sup>    | 9.82 <sup>a</sup>    |
| Vitamin B6<br>(mg/day)            | 0.87 <sup>a,b</sup>   | 0.93 <sup>b</sup>    | 1.11 <sup>a</sup>    | 0.91 <sup>b</sup>    | 0.95 <sup>b</sup>    | 1.19 <sup>a</sup>    |
| Vitamin C<br>(mg/day)             | 47.02 <sup>b</sup>    | 62.28 <sup>b</sup>   | 81.99 <sup>a</sup>   | 43.93 <sup>c</sup>   | 70.64 <sup>b</sup>   | 99.32 <sup>a</sup>   |
| Vitamin E<br>(mg/day)             | 5.78 <sup>c</sup>     | 6.94 <sup>b</sup>    | 9.39 <sup>a</sup>    | 6.32 <sup>c</sup>    | 8.23 <sup>b</sup>    | 9.85 <sup>a</sup>    |
| β-carotene equivalent<br>(µg/day) | 1320.29 <sup>b</sup>  | 1709.88 <sup>b</sup> | 3100.68 <sup>a</sup> | 1296.46 <sup>c</sup> | 2315.10 <sup>b</sup> | 3701.66 <sup>a</sup> |
| Total folate<br>(µg/day)          | 132.51 <sup>c</sup>   | 156.91 <sup>b</sup>  | 227.33 <sup>a</sup>  | 131.78 <sup>c</sup>  | 207.31 <sup>b</sup>  | 250.78 <sup>a</sup>  |
| Vitamin D<br>(µg/day)             | 0.95 <sup>a</sup>     | 0.67 <sup>a</sup>    | 0.22 <sup>b</sup>    | 1.21 <sup>a</sup>    | 0.34 <sup>b</sup>    | 0.02 <sup>c</sup>    |
| Water<br>(mL/day)                 | 331.51 <sup>a</sup>   | 450.93 <sup>a</sup>  | 385.19 <sup>a</sup>  | 420.33 <sup>a</sup>  | 400.08 <sup>a</sup>  | 406.58 <sup>a</sup>  |
| Alcoholic beverages<br>(mL/day)   | 77.28 <sup>a</sup>    | 28.77 <sup>b</sup>   | 27.28 <sup>b</sup>   | 55.79 <sup>a</sup>   | 20.99 <sup>b</sup>   | 18.93 <sup>b</sup>   |
| Coffee<br>(mL/day)                | 35.79 <sup>a</sup>    | 33.81 <sup>a</sup>   | 32.44 <sup>a</sup>   | 43.69 <sup>a</sup>   | 28.46 <sup>a,b</sup> | 21.64 <sup>b</sup>   |
| Meat<br>(g/day)                   | 26.96 <sup>a</sup>    | 0.00 <sup>b</sup>    | 0.00 <sup>b</sup>    | 25.27 <sup>a</sup>   | 0.00 <sup>b</sup>    | 0.00 <sup>b</sup>    |
| Cereals<br>(g/day)                | 26.58 <sup>a</sup>    | 27.60 <sup>a</sup>   | 32.10 <sup>a</sup>   | 26.93 <sup>b</sup>   | 32.40 <sup>a</sup>   | 34.07 <sup>a</sup>   |
| Sweets<br>(g/day)                 | 56.61 <sup>a</sup>    | 47.03 <sup>a</sup>   | 25.60 <sup>b</sup>   | 52.70 <sup>a</sup>   | 44.88 <sup>a</sup>   | 16.32 <sup>b</sup>   |
| Flours<br>(g/day)                 | 11.42 <sup>a</sup>    | 6.78 <sup>a</sup>    | 12.35 <sup>a</sup>   | 5.27 <sup>b</sup>    | 9.81 <sup>b</sup>    | 19.89 <sup>a</sup>   |
| Cheese<br>(g/day)                 | 22.26 <sup>a</sup>    | 24.66 <sup>a</sup>   | 0.00 <sup>b</sup>    | 23.58 <sup>a</sup>   | 18.21 <sup>b</sup>   | 0.00 <sup>c</sup>    |

|                                      |                    |                     |                     |                    |                     |                     |
|--------------------------------------|--------------------|---------------------|---------------------|--------------------|---------------------|---------------------|
| Fruit (g/day)                        | 60.59 <sup>b</sup> | 89.05 <sup>b</sup>  | 128.20 <sup>a</sup> | 61.26 <sup>c</sup> | 121.28 <sup>b</sup> | 180.10 <sup>a</sup> |
| Oils and fats (g/day)                | 13.77 <sup>b</sup> | 18.31 <sup>b</sup>  | 21.87 <sup>a</sup>  | 16.66 <sup>c</sup> | 19.37 <sup>b</sup>  | 24.01 <sup>a</sup>  |
| Animal milk and derivates (g/day)    | 38.29 <sup>a</sup> | 26.72 <sup>a</sup>  | 0.00 <sup>b</sup>   | 52.25 <sup>a</sup> | 3.37 <sup>b</sup>   | 0.00 <sup>c</sup>   |
| Vegetable milk and derivates (g/day) | 0.00 <sup>b</sup>  | 0.00 <sup>b</sup>   | 33.14 <sup>a</sup>  | 0.00 <sup>c</sup>  | 13.09 <sup>b</sup>  | 42.14 <sup>a</sup>  |
| Pulses (g/day)                       | 2.03 <sup>b</sup>  | 9.29 <sup>b</sup>   | 38.53 <sup>a</sup>  | 3.36 <sup>c</sup>  | 36.36 <sup>b</sup>  | 44.44 <sup>a</sup>  |
| Tea (mL/day)                         | 19.79 <sup>a</sup> | 18.44 <sup>a</sup>  | 10.78 <sup>a</sup>  | 13.64 <sup>b</sup> | 45.09 <sup>a</sup>  | 2.82 <sup>b</sup>   |
| Bread (g/day)                        | 55.72 <sup>a</sup> | 59.51 <sup>a</sup>  | 58.89 <sup>a</sup>  | 59.83 <sup>a</sup> | 59.51 <sup>a</sup>  | 52.49 <sup>a</sup>  |
| Potatoes (g/day)                     | 16.85 <sup>a</sup> | 17.58 <sup>a</sup>  | 15.21 <sup>a</sup>  | 15.14 <sup>a</sup> | 16.85 <sup>a</sup>  | 17.58 <sup>a</sup>  |
| Fish (g/day)                         | 7.25 <sup>a</sup>  | 0.00 <sup>b</sup>   | 0.00 <sup>b</sup>   | 13.12 <sup>a</sup> | 0.00 <sup>b</sup>   | 0.00 <sup>b</sup>   |
| Preserved meat (g/day)               | 17.57 <sup>a</sup> | 0.00 <sup>b</sup>   | 0.00 <sup>b</sup>   | 17.79 <sup>a</sup> | 0.00 <sup>b</sup>   | 0.00 <sup>b</sup>   |
| Soft drinks (mL/day)                 | 24.67 <sup>a</sup> | 0.00 <sup>b</sup>   | 0.00 <sup>b</sup>   | 0.00 <sup>a</sup>  | 0.00 <sup>a</sup>   | 0.00 <sup>a</sup>   |
| Fruit juices (mL/day)                | 16.70 <sup>a</sup> | 6.71 <sup>a</sup>   | 7.39 <sup>a</sup>   | 10.02 <sup>a</sup> | 2.39 <sup>a</sup>   | 11.64 <sup>a</sup>  |
| Eggs (g/day)                         | 9.70 <sup>a</sup>  | 5.16 <sup>a</sup>   | 0.00 <sup>b</sup>   | 5.90 <sup>a</sup>  | 5.16 <sup>a</sup>   | 0.00 <sup>b</sup>   |
| Vegetables (g/day)                   | 88.40 <sup>c</sup> | 130.62 <sup>b</sup> | 192.77 <sup>a</sup> | 97.70 <sup>c</sup> | 166.95 <sup>b</sup> | 217.25 <sup>a</sup> |

Daily intakes are normalized for 1000 kcal.

Different letters indicate significantly different values ( $P < 0.05$ ) as calculated by pairwise Wilcoxon tests among the groups of adherence to MD or diet type.

**Table S2.** Diet-microbiota associations.

| <b>O vs V diet</b>                                      |                        |                        |
|---------------------------------------------------------|------------------------|------------------------|
| <b>O diet negatively associated genera</b>              | <b>p-value</b>         | <b>FDR</b>             |
| <i>Roseburia</i>                                        | 4.60*10 <sup>-5</sup>  | 0.0013                 |
| <i>Lachnospira</i>                                      | 0.00016                | 0.0023                 |
| <i>Prevotella</i>                                       | 0.00045                | 0.0052                 |
| <b>O diet positively associated genera</b>              | <b>p-value</b>         | <b>FDR</b>             |
| <i>L-Ruminococcus</i>                                   | 1.18*10 <sup>-11</sup> | 6.74*10 <sup>-10</sup> |
| <i>Oscillospira</i>                                     | 0.0016                 | 0.013                  |
| <b>O vs VG diet</b>                                     |                        |                        |
| <b>O diet negatively associated taxa</b>                | <b>p-value</b>         | <b>FDR</b>             |
| <i>Lachnospira</i>                                      | 0.00245                | 0.026                  |
| <b>O diet positively associated taxa</b>                | <b>p-value</b>         | <b>FDR</b>             |
| <i>L-Ruminococcus</i>                                   | 1.47*10 <sup>-6</sup>  | 8*10 <sup>-5</sup>     |
| <i>Veillonellaceae</i>                                  | 0.0012                 | 0.022                  |
| <b>V vs VG diet</b>                                     |                        |                        |
| <b>VG diet positively associated taxa</b>               | <b>p-value</b>         | <b>FDR</b>             |
| <i>Oscillospira</i>                                     | 0.003                  | 0.047                  |
| <b>HFD highest vs lowest quartile</b>                   |                        |                        |
| <b>Highest quartile positively associated genera</b>    | <b>p-value</b>         | <b>FDR</b>             |
| <i>Lachnospira</i>                                      | 0.0011                 | 0.0281                 |
| <b>Highest quartile negatively associated genera</b>    | <b>p-value</b>         | <b>FDR</b>             |
| <i>Collinsella</i>                                      | 9.80*10 <sup>-05</sup> | 0.005                  |
| <b>HFD middle vs lowest quartile</b>                    |                        |                        |
| <b>HFD middle quartile positively associated genera</b> | <b>p-value</b>         | <b>FDR</b>             |
| <i>Prevotella</i>                                       | 3.30*10 <sup>-03</sup> | 0.0243                 |
| <i>Citrobacter</i>                                      | 3.04*10 <sup>-03</sup> | 0.0243                 |
| <b>HFD middle quartile negatively associated genera</b> | <b>p-value</b>         | <b>FDR</b>             |
| <i>Coprobacillus</i>                                    | 2.32*10 <sup>-05</sup> | 0.00057                |
| <i>Collinsella</i>                                      | 2.73*10 <sup>-05</sup> | 0.00057                |
| <i>Enterococcus</i>                                     | 3.50*10 <sup>-03</sup> | 0.0243                 |

The significance is based on DESeq analysis.

**Table S3.** Median levels of fecal metabolites identified by GC-MS/SPME and <sup>1</sup>H-NMR analyses\*.

| Compounds identified by GC-MS/SPME (ppm)    | Diet type           |                      |                       | Adherence to MD       |                      |                     |
|---------------------------------------------|---------------------|----------------------|-----------------------|-----------------------|----------------------|---------------------|
|                                             | O                   | V                    | VG                    | low                   | medium               | high                |
| Butan-1-ol                                  | 0.012 <sup>b</sup>  | 0.061 <sup>a</sup>   | 0.028 <sup>a,b</sup>  | 0.010 <sup>a</sup>    | 0.023 <sup>a</sup>   | 0.053 <sup>a</sup>  |
| octan-1-ol                                  | 0.002 <sup>a</sup>  | 0.004 <sup>a</sup>   | 0.006 <sup>a</sup>    | 0.005 <sup>a,b</sup>  | 0.002 <sup>b</sup>   | 0.005 <sup>a</sup>  |
| 1-octen-3-ol/2,2-dimethyl-4-octen-3-ol      | 0.008 <sup>b</sup>  | 0.017 <sup>a,b</sup> | 0.014 <sup>a</sup>    | 0.003 <sup>a</sup>    | 0.013 <sup>a</sup>   | 0.014 <sup>a</sup>  |
| propan-1-ol                                 | 0.096 <sup>b</sup>  | 0.497 <sup>a</sup>   | 0.312 <sup>a</sup>    | 0.096 <sup>a,b</sup>  | 0.171 <sup>b</sup>   | 0.383 <sup>a</sup>  |
| 2-methylpentan-3-ol                         | 0.003 <sup>a</sup>  | 0.001 <sup>b</sup>   | 0.002 <sup>a</sup>    | 0.002 <sup>a</sup>    | 0.004 <sup>a</sup>   | 0.002 <sup>a</sup>  |
| pentan-2-one                                | 2.261 <sup>a</sup>  | 3.422 <sup>a</sup>   | 3.452 <sup>a</sup>    | 2.359 <sup>a,b</sup>  | 2.248 <sup>b</sup>   | 3.448 <sup>a</sup>  |
| 2-pentyl-furan                              | 0.044 <sup>b</sup>  | 0.218 <sup>a</sup>   | 0.122 <sup>a,b</sup>  | 0.037 <sup>b</sup>    | 0.041 <sup>a</sup>   | 0.210 <sup>a</sup>  |
| 2,4-dimethylhept-1-ene                      | 0.035 <sup>b</sup>  | 0.266 <sup>a</sup>   | 0.069 <sup>b</sup>    | 0.022 <sup>b</sup>    | 0.030 <sup>b</sup>   | 0.169 <sup>a</sup>  |
| pentane-2,4-dione                           | 0.007 <sup>a</sup>  | 0.002 <sup>b</sup>   | 0.005 <sup>a,b</sup>  | 0.008 <sup>a</sup>    | 0.006 <sup>a</sup>   | 0.004 <sup>a</sup>  |
| 3-hydroxybutan-2-one                        | 0.015 <sup>a</sup>  | 0.003 <sup>b</sup>   | 0.011 <sup>a</sup>    | 0.007 <sup>a</sup>    | 0.011 <sup>a</sup>   | 0.006 <sup>a</sup>  |
| 3-methyl-indole                             | 4.797 <sup>a</sup>  | 0.885 <sup>b</sup>   | 1.171 <sup>b</sup>    | 5.677 <sup>a</sup>    | 2.542 <sup>a</sup>   | 1.708 <sup>a</sup>  |
| 4-methylphenol                              | 23.551 <sup>a</sup> | 13.419 <sup>b</sup>  | 17.138 <sup>a,b</sup> | 23.551 <sup>a</sup>   | 14.672 <sup>a</sup>  | 18.313 <sup>a</sup> |
| Butyl acetate                               | 0.001 <sup>b</sup>  | 0.030 <sup>a</sup>   | 0.007 <sup>a,b</sup>  | 0.002 <sup>a,b</sup>  | 0.002 <sup>b</sup>   | 0.018 <sup>a</sup>  |
| acetophenone                                | 0.054 <sup>a</sup>  | 0.055 <sup>a</sup>   | 0.065 <sup>a</sup>    | 0.047 <sup>a,b</sup>  | 0.050 <sup>b</sup>   | 0.076 <sup>a</sup>  |
| benzaldehyde                                | 0.358 <sup>a</sup>  | 0.366 <sup>a</sup>   | 0.483 <sup>a</sup>    | 0.205 <sup>a</sup>    | 0.469 <sup>a</sup>   | 0.416 <sup>b</sup>  |
| 2-phenylacetaldehyde                        | 0.074 <sup>a</sup>  | 0.105 <sup>a</sup>   | 0.095 <sup>a</sup>    | 0.047 <sup>b</sup>    | 0.074 <sup>a,b</sup> | 0.107 <sup>a</sup>  |
| 3-phenylpropan-1-ol                         | 0.001 <sup>b</sup>  | 0.003 <sup>a,b</sup> | 0.004 <sup>a</sup>    | 0.002 <sup>a</sup>    | 0.001 <sup>a</sup>   | 0.003 <sup>a</sup>  |
| methyl 2-hydroxybenzoate                    | 0.013 <sup>b</sup>  | 0.055 <sup>a</sup>   | 0.065 <sup>a</sup>    | 0.027 <sup>a,b</sup>  | 0.013 <sup>b</sup>   | 0.062 <sup>a</sup>  |
| ethyl butanoate                             | 0.165 <sup>b</sup>  | 1.393 <sup>a</sup>   | 0.873 <sup>a</sup>    | 0.300 <sup>b</sup>    | 0.110 <sup>b</sup>   | 1.303 <sup>a</sup>  |
| hexyl butanoate                             | 0.175 <sup>b</sup>  | 1.470 <sup>a</sup>   | 0.546 <sup>a</sup>    | 0.404 <sup>b</sup>    | 0.201 <sup>b</sup>   | 1.033 <sup>a</sup>  |
| methyl butanoate                            | 0.287 <sup>b</sup>  | 1.389 <sup>a</sup>   | 1.250 <sup>a</sup>    | 0.955 <sup>a,b</sup>  | 0.332 <sup>b</sup>   | 1.379 <sup>a</sup>  |
| propyl butanoate                            | 0.102 <sup>b</sup>  | 1.131 <sup>a</sup>   | 0.530 <sup>a</sup>    | 0.185 <sup>b</sup>    | 0.124 <sup>b</sup>   | 0.837 <sup>a</sup>  |
| dimethyl sulfide                            | 0.121 <sup>a</sup>  | 0.064 <sup>a</sup>   | 0.105 <sup>a</sup>    | 0.260 <sup>a</sup>    | 0.105 <sup>b</sup>   | 0.090 <sup>b</sup>  |
| ethyl acetate                               | 0.011 <sup>b</sup>  | 0.058 <sup>a</sup>   | 0.041 <sup>a</sup>    | 0.007 <sup>b</sup>    | 0.011 <sup>b</sup>   | 0.053 <sup>a</sup>  |
| ethanol                                     | 0.324 <sup>b</sup>  | 0.838 <sup>a</sup>   | 0.567 <sup>a,b</sup>  | 0.202 <sup>b</sup>    | 0.324 <sup>b</sup>   | 0.802 <sup>a</sup>  |
| indole                                      | 11.370 <sup>a</sup> | 4.204 <sup>b</sup>   | 8.224 <sup>a</sup>    | 6.102 <sup>a</sup>    | 8.643 <sup>a</sup>   | 6.677 <sup>a</sup>  |
| propyl acetate                              | 0.002 <sup>c</sup>  | 0.029 <sup>a</sup>   | 0.015 <sup>b</sup>    | 0.002 <sup>a,b</sup>  | 0.004 <sup>b</sup>   | 0.019 <sup>a</sup>  |
| ethyl pentanoate                            | 0.115 <sup>b</sup>  | 0.406 <sup>a</sup>   | 0.220 <sup>a,b</sup>  | 0.073 <sup>b</sup>    | 0.056 <sup>b</sup>   | 0.406 <sup>a</sup>  |
| butyl propanoate                            | 0.041 <sup>b</sup>  | 0.125 <sup>a</sup>   | 0.115 <sup>a</sup>    | 0.147 <sup>a</sup>    | 0.036 <sup>a</sup>   | 0.131 <sup>a</sup>  |
| ethyl propanoate                            | 0.034 <sup>a</sup>  | 0.098 <sup>a</sup>   | 0.091 <sup>a</sup>    | 0.064 <sup>a,b</sup>  | 0.024 <sup>b</sup>   | 0.111 <sup>a</sup>  |
| propyl propanoate                           | 0.012 <sup>b</sup>  | 0.066 <sup>a</sup>   | 0.041 <sup>a</sup>    | 0.024 <sup>a</sup>    | 0.019 <sup>a</sup>   | 0.051 <sup>a</sup>  |
| <b>Compounds identified by NMR (μmol/g)</b> |                     |                      |                       |                       |                      |                     |
| hypoxanthine                                | 1.242 <sup>b</sup>  | 1.540 <sup>a</sup>   | 1.363 <sup>a</sup>    | 1.238 <sup>b</sup>    | 1.172 <sup>b</sup>   | 1.496 <sup>a</sup>  |
| urocanate                                   | 0.643 <sup>a</sup>  | 0.660 <sup>a</sup>   | 0.790 <sup>a</sup>    | 0.643 <sup>a,b</sup>  | 0.594 <sup>b</sup>   | 0.781 <sup>a</sup>  |
| glucose                                     | 0.743 <sup>b</sup>  | 18.271 <sup>a</sup>  | 9.717 <sup>a</sup>    | 7.792 <sup>b</sup>    | 8.794 <sup>b</sup>   | 12.085 <sup>a</sup> |
| ribose                                      | 1.494 <sup>b</sup>  | 2.199 <sup>a</sup>   | 1.184 <sup>b</sup>    | 1.933 <sup>a</sup>    | 1.494 <sup>a</sup>   | 1.880 <sup>a</sup>  |
| glycerol                                    | 6.176 <sup>b</sup>  | 22.911 <sup>a</sup>  | 20.467 <sup>a,b</sup> | 17.520 <sup>b</sup>   | 15.647 <sup>b</sup>  | 21.775 <sup>a</sup> |
| methionine                                  | 1.953 <sup>a</sup>  | 1.834 <sup>b</sup>   | 1.957 <sup>a</sup>    | 1.876 <sup>a</sup>    | 2.004 <sup>a</sup>   | 1.891 <sup>a</sup>  |
| methylamine                                 | 0.258 <sup>a</sup>  | 0.196 <sup>b</sup>   | 0.178 <sup>b</sup>    | 0.271 <sup>a</sup>    | 0.208 <sup>a</sup>   | 0.189 <sup>b</sup>  |
| succinate                                   | 0.255 <sup>a</sup>  | 0.222 <sup>b</sup>   | 0.250 <sup>a,b</sup>  | 0.292 <sup>a</sup>    | 0.233 <sup>a</sup>   | 0.246 <sup>a</sup>  |
| glutamate                                   | 11.382 <sup>a</sup> | 8.923 <sup>b</sup>   | 11.117 <sup>a</sup>   | 11.608 <sup>a</sup>   | 11.382 <sup>a</sup>  | 9.955 <sup>a</sup>  |
| alanine                                     | 11.283 <sup>a</sup> | 8.791 <sup>b</sup>   | 12.245 <sup>a</sup>   | 11.547 <sup>a,b</sup> | 11.976 <sup>a</sup>  | 10.371 <sup>b</sup> |

---

|            |                      |                    |                    |                    |                      |                    |
|------------|----------------------|--------------------|--------------------|--------------------|----------------------|--------------------|
| valerate   | 4.309 <sup>a</sup>   | 2.412 <sup>b</sup> | 3.311 <sup>a</sup> | 5.611 <sup>a</sup> | 3.538 <sup>a,b</sup> | 3.257 <sup>b</sup> |
| isoleucine | 3.733 <sup>b</sup>   | 3.644 <sup>b</sup> | 4.171 <sup>a</sup> | 3.543 <sup>a</sup> | 3.801 <sup>a</sup>   | 3.855 <sup>a</sup> |
| valine     | 4.408 <sup>a,b</sup> | 4.027 <sup>b</sup> | 4.719 <sup>a</sup> | 4.228 <sup>a</sup> | 4.855 <sup>a</sup>   | 4.329 <sup>a</sup> |
| leucine    | 7.601 <sup>a</sup>   | 7.298 <sup>b</sup> | 8.209 <sup>a</sup> | 7.162 <sup>a</sup> | 8.289 <sup>a</sup>   | 7.500 <sup>a</sup> |

---

\*Only metabolites showing significant differences between diet types (O, V, VG) or levels of adherence to the MD are listed in this table. Different letters indicate a significant difference (P<0.05) between diet types or adherence to MD.
